# Supplementary material
Source: Elsevier journal article supplement (http://raiithold.iith.ac.in/1359/1/mmc1.pdf)
Supplement: mmc1 [file mmc1.pdf]

# Thermal, Optical and Structural Properties of Disulfide and Diselenide Salts with Weakly Associated Anions

Katam Srinivas, Chatla Naga Babu and Ganesan Prabusankar\*

Department of Chemistry, Indian Institute of Technology Hyderabad, ODF Campus,

Yeddumailaram, TS, INDIA-502 205. Fax: +91 40 2301 6032; Tel: +91 40 2301 6089; E-mail: prabu@iith.ac.in

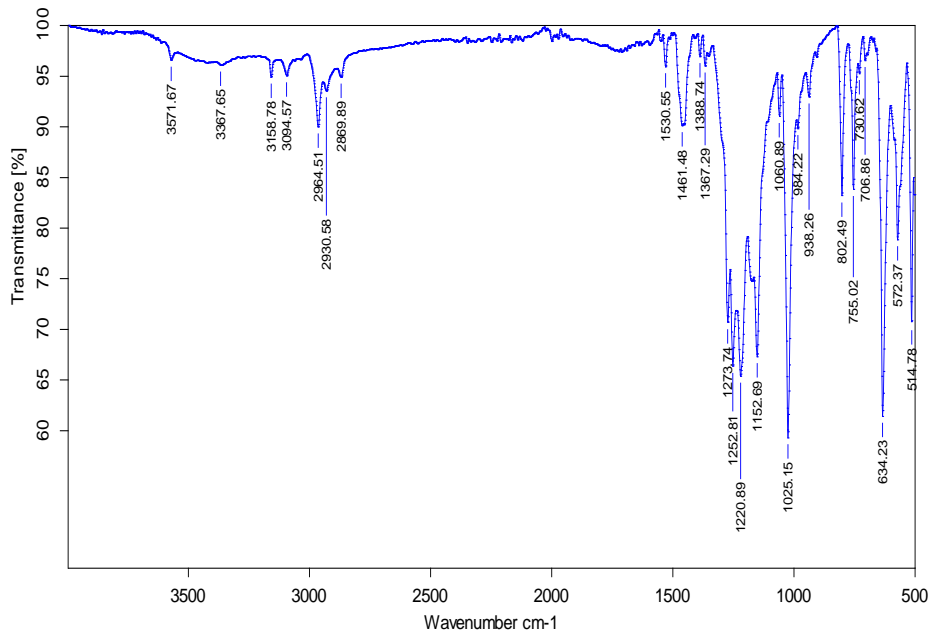

**Figure S1.** FT-IR (neat) spectra of **1** at RT.

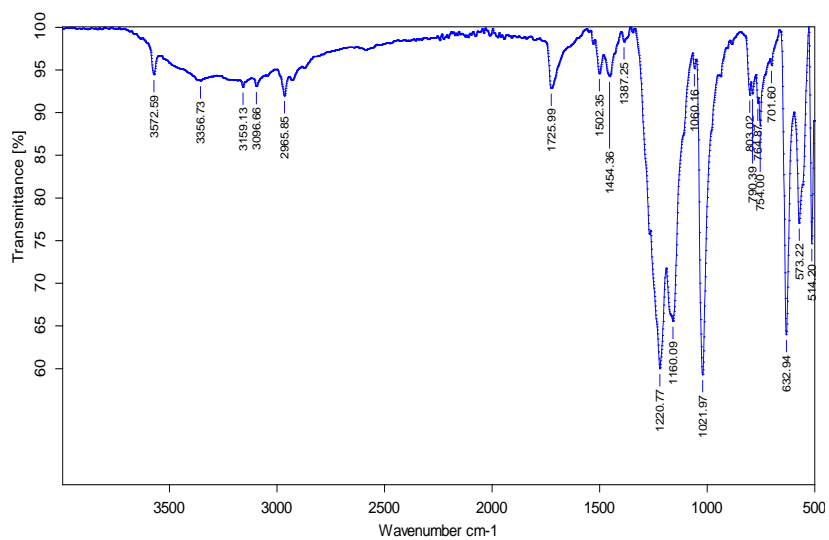

**Figure S2.** FT-IR (neat) spectra of **2** at RT.

## Supporting Information

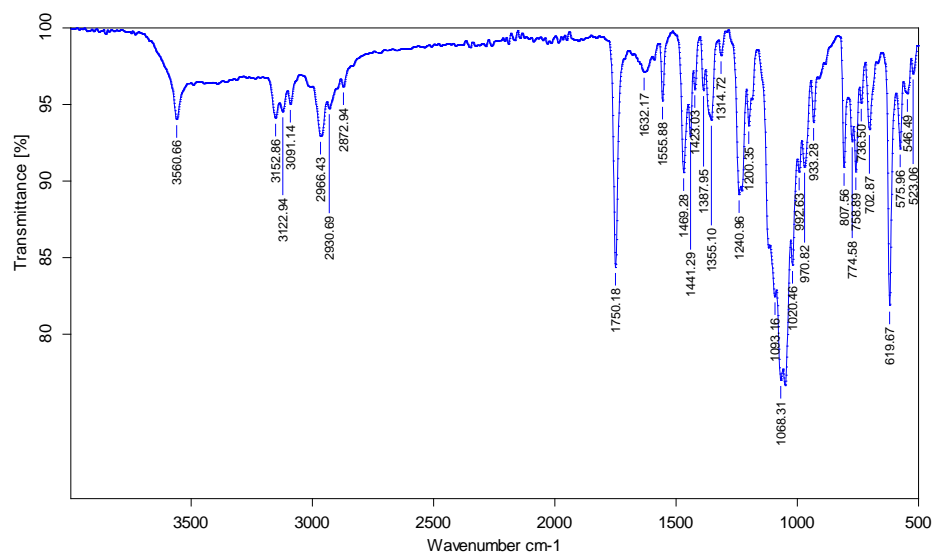

**Figure S3.** FT-IR (neat) spectra of **3** at RT.
